# Supplementary material
Source: PubMed Central journal article supplement (PMC1863489)

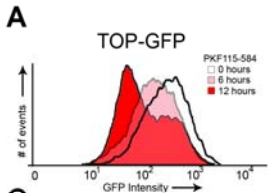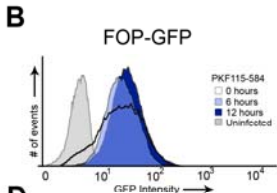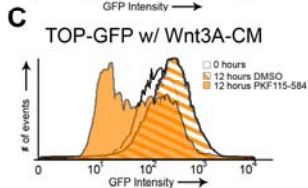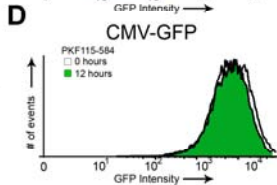

Supplement: pnas_0610299104_1.pdf [file pnas_0610299104_1.pdf]

**A**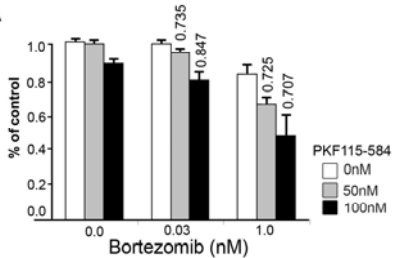**B**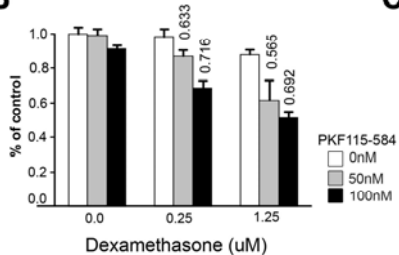**C**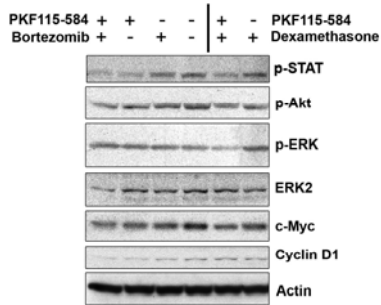

Supplement: pnas_0610299104_2.pdf [file pnas_0610299104_2.pdf]
